# Supplementary material for: Cell-Free DNA Screening for Sex Chromosome Abnormalities and Pregnancy Outcomes, 2018–2020: A Retrospective Analysis
Source: MDPI journal article supplement (doi:10.3390/jpm12010048), 2022-01-04
Supplement: s1 [file s1]

**Table S1. Comparison between TP and FP, number of births and TOP in SCA cases.**

|          | Cases with TP(n) | Cases with FP(n) | Number of births(n) | Number of TOP(n) |
|----------|------------------|------------------|---------------------|------------------|
| 45, X    | 37               | 167              | 216                 | 38               |
| 47, XXX  | 37               | 26               | 58                  | 17               |
| 47, XXY  | 110              | 26               | 47                  | 101              |
| 47, XYY  | 42               | 17               | 63                  | 11               |
| Total    | 226              | 236              | 384                 | 167              |
| $\chi^2$ | 147.09           |                  | 139.59              |                  |
| P        | <2.2E-16         |                  | <2.2E-16            |                  |

**Abbreviation:** TP: true positive ; FP : false positive ; TOP: The termination of pregnancy; SCA: Sex chromosome aneuploidy.

**Table S2. Pairwise comparison of four types of SCA cases with TP and FP.**

| Number | Type    | Cases with TP(n) | Cases with FP(n) | $\chi^2$ | P         |
|--------|---------|------------------|------------------|----------|-----------|
| 1      | 45, X   | 37               | 167              | 37.59    | 8.727E-10 |
|        | 47, XXX | 37               | 26               |          |           |
| 2      | 45, X   | 37               | 167              | 128.35   | < 2.2E-16 |
|        | 47, XXY | 110              | 26               |          |           |
| 3      | 45, X   | 37               | 167              | 58.786   | 1.758E-14 |
|        | 47, XYY | 42               | 17               |          |           |
| 4      | 47, XXX | 37               | 26               | 9.8282   | 0.001719  |
|        | 47, XXY | 110              | 26               |          |           |
| 5      | 47, XXX | 37               | 26               | 1.5614   | 0.2115    |
|        | 47, XYY | 42               | 17               |          |           |
| 6      | 47, XXY | 110              | 26               | 1.7218   | 0.1895    |
|        | 47, XYY | 42               | 17               |          |           |

**Abbreviation:** TP: true positive ; FP : false positive ; SCA: Sex chromosome aneuploidy.

**Table S3. Pairwise comparison of four types of SCA cases with number of births and TOP.**

| Number | Type    | Number of births(n) | Number of TOP(n) | $\chi^2$   | P         |
|--------|---------|---------------------|------------------|------------|-----------|
| 1      | 45, X   | 216                 | 38               | 1.9472     | 0.1629    |
|        | 47, XXX | 58                  | 17               |            |           |
| 2      | 45, X   | 216                 | 38               | 115.02     | < 2.2E-16 |
|        | 47, XXY | 47                  | 101              |            |           |
| 3      | 45, X   | 216                 | 38               | 2.3368E-31 | 1         |
|        | 47, XYY | 63                  | 11               |            |           |
| 4      | 47, XXX | 58                  | 17               | 39.69      | 9.76E-08  |
|        | 47, XXY | 47                  | 101              |            |           |
| 5      | 47, XXX | 58                  | 17               | 1.0184     | 0.3129    |
|        | 47, XYY | 63                  | 11               |            |           |
| 6      | 47, XXY | 47                  | 101              | 54.115     | 1.891E-13 |
|        | 47, XYY | 63                  | 11               |            |           |

**Abbreviation:** TOP: The termination of pregnancy.
